# Supplementary material for: Assistive technology acceptance for visually impaired individuals: a case study of students in Saudi Arabia
Source: PeerJ journal article supplement (doi:10.7717/peerj-cs.886), 2022-03-11
Supplement: Appendix_A_68950_JT_staff.pdf [file Appendix_A_68950_JT_staff.pdf]

## Appendix A. Descriptive Statistics of the Observed Variables

| Item | N  | Minimum | Maximum | Mean | Std. Deviation | Skewness | Kurtosis |
|------|----|---------|---------|------|----------------|----------|----------|
| PE1  | 84 | 3.00    | 5.00    | 4.79 | 0.47           | -2.11    | 3.89     |
| PE2  | 84 | 2.00    | 5.00    | 4.68 | 0.56           | -1.99    | 5.22     |
| PE3  | 84 | 3.00    | 5.00    | 4.64 | 0.55           | -1.25    | 0.64     |
| PE4  | 84 | 1.00    | 5.00    | 4.39 | 0.78           | -1.61    | 3.82     |
| PE5  | 84 | 1.00    | 5.00    | 4.37 | 0.94           | -1.78    | 3.18     |
| PE6  | 84 | 1.00    | 5.00    | 4.24 | 0.83           | -1.25    | 2.16     |
| EE1  | 84 | 1.00    | 5.00    | 4.27 | 0.90           | -1.91    | 4.76     |
| EE2  | 84 | 1.00    | 5.00    | 4.23 | 0.80           | -1.31    | 2.84     |
| EE3  | 84 | 2.00    | 5.00    | 4.23 | 0.70           | -0.56    | 0.03     |
| EE4  | 84 | 1.00    | 5.00    | 4.23 | 0.84           | -1.57    | 3.86     |
| EE5  | 84 | 2.00    | 5.00    | 4.20 | 0.79           | -0.83    | 0.41     |
| EE6  | 84 | 2.00    | 5.00    | 4.20 | 0.72           | -0.91    | 1.35     |
| SI1  | 84 | 1.00    | 5.00    | 3.44 | 1.19           | -0.30    | -0.64    |
| SI2  | 84 | 1.00    | 5.00    | 3.80 | 1.15           | -0.86    | 0.10     |
| SI3  | 84 | 1.00    | 5.00    | 2.87 | 1.29           | -0.10    | -1.09    |
| SI4  | 84 | 1.00    | 5.00    | 3.12 | 1.35           | -0.25    | -1.20    |
| SI5  | 84 | 1.00    | 5.00    | 2.61 | 1.41           | 0.23     | -1.25    |
| SI6  | 84 | 1.00    | 5.00    | 3.31 | 1.17           | -0.54    | -0.32    |
| FC1  | 84 | 1.00    | 5.00    | 3.13 | 1.15           | -0.16    | -0.86    |
| FC2  | 84 | 1.00    | 5.00    | 4.05 | 0.71           | -1.10    | 3.60     |
| FC3  | 84 | 1.00    | 5.00    | 3.46 | 0.97           | -0.50    | -0.01    |
| FC4  | 84 | 1.00    | 5.00    | 2.98 | 1.46           | -0.03    | -1.33    |
| FC5  | 84 | 1.00    | 5.00    | 3.89 | 0.86           | -0.82    | 0.88     |
| FC6  | 84 | 1.00    | 5.00    | 4.30 | 0.76           | -1.24    | 2.93     |
| ATT1 | 84 | 4.00    | 5.00    | 4.79 | 0.41           | -1.42    | 0.01     |
| ATT2 | 84 | 2.00    | 5.00    | 4.39 | 0.74           | -1.15    | 1.04     |
| ATT3 | 84 | 2.00    | 5.00    | 4.43 | 0.70           | -1.04    | 0.67     |
| ATT4 | 84 | 1.00    | 5.00    | 4.40 | 0.81           | -1.58    | 3.12     |
| ATT5 | 84 | 1.00    | 5.00    | 4.42 | 0.91           | -1.92    | 3.97     |
| ATT6 | 84 | 2.00    | 5.00    | 4.20 | 0.72           | -0.72    | 0.56     |
| BI1  | 84 | 2.00    | 5.00    | 4.39 | 0.66           | -0.89    | 0.87     |
| BI2  | 84 | 2.00    | 5.00    | 4.56 | 0.65           | -1.46    | 2.16     |
| BI3  | 84 | 2.00    | 5.00    | 4.42 | 0.79           | -1.49    | 2.05     |

| Item | N  | Minimum | Maximum | Mean | Std. Deviation | Skewness | Kurtosis |
|------|----|---------|---------|------|----------------|----------|----------|
| BI4  | 84 | 1.00    | 5.00    | 4.46 | 0.81           | -1.88    | 4.18     |
| BI5  | 84 | 2.00    | 5.00    | 4.55 | 0.68           | -1.68    | 3.17     |
| SE1  | 84 | 2.00    | 5.00    | 4.08 | 0.85           | -0.76    | 0.10     |
| SE2  | 84 | 1.00    | 5.00    | 4.08 | 0.82           | -1.08    | 1.91     |
| SE3  | 84 | 1.00    | 5.00    | 4.07 | 0.90           | -1.25    | 2.11     |
| SE4  | 84 | 1.00    | 5.00    | 3.55 | 0.96           | -0.39    | -0.12    |
| SE5  | 84 | 2.00    | 5.00    | 4.56 | 0.59           | -1.33    | 2.72     |
| SE6  | 84 | 3.00    | 5.00    | 4.63 | 0.51           | -0.83    | -0.68    |
| SE7  | 84 | 1.00    | 5.00    | 4.27 | 0.95           | -1.71    | 3.35     |
| AN1  | 84 | 1.00    | 5.00    | 1.77 | 1.05           | 1.38     | 1.21     |
| AN2  | 84 | 1.00    | 5.00    | 2.63 | 1.25           | 0.17     | -1.26    |
| AN3  | 84 | 1.00    | 5.00    | 1.95 | 1.04           | 1.08     | 0.60     |
| AN4  | 84 | 1.00    | 5.00    | 1.94 | 1.19           | 1.23     | 0.49     |
| AN5  | 84 | 1.00    | 5.00    | 1.52 | 0.86           | 1.92     | 3.80     |
| AC1  | 84 | 1.00    | 5.00    | 2.85 | 1.31           | -0.13    | -1.12    |
| AC2  | 84 | 1.00    | 5.00    | 4.48 | 0.81           | -1.91    | 4.28     |
| AC3  | 84 | 2.00    | 5.00    | 4.46 | 0.78           | -1.50    | 1.83     |
| AC4  | 84 | 3.00    | 5.00    | 4.71 | 0.48           | -1.30    | 0.48     |
| AC5  | 84 | 4.00    | 5.00    | 4.82 | 0.39           | -1.71    | 0.94     |
| UB1  | 84 | 2.00    | 5.00    | 4.56 | 0.72           | -1.92    | 3.98     |
| UB2  | 84 | 2.00    | 5.00    | 4.45 | 0.72           | -1.53    | 2.87     |
| UB3  | 84 | 2.00    | 5.00    | 4.24 | 0.87           | -1.04    | 0.45     |
| UB4  | 84 | 1.00    | 5.00    | 4.26 | 0.92           | -1.31    | 1.47     |
