# Supplementary material for: Assistive technology acceptance for visually impaired individuals: a case study of students in Saudi Arabia
Source: PeerJ journal article supplement (doi:10.7717/peerj-cs.886), 2022-03-11
Supplement: Arabic_Survey1.pdf [file Arabic_Survey1.pdf]

## الجزء الأول : المعلومات العامة

الرجاء اختيار ماتراه مناسباً لك من العناصر التالية

س1) الجنس

- انثى  ذكر

س2) حدد عمرك من التالي :

- 18-21  22-25  26-30  31-34  أكبر من 34

س3) ما هو المؤهل التعليمي الذي تقوم بدراسته حالياً؟

- دبلوم  بكالوريوس  ماجستير  دكتوراه

س4) كيف تقيم نفسك في مهارات استخدام الحاسب الآلي؟

- مبتدئ  متوسط  متقدم

س5) منذ متى وأنت تعاني من إعاقة بصرية؟

- منذ الولادة  منذ أكثر من 10 سنوات  من 5 الى 10 سنوات  أقل من 5 سنوات

س6) ما هو مستوى الإعاقة البصرية لديك؟

- ضعف بصر معتدل  ضعف بصر شديد  عمى كلي

س8) ماهي الجامعة التي تدرس بها حالياً؟

- الملك سعود  الملك عبدالعزيز  الملك فيصل  أخرى حدد .....

س9) اختر نوع التقنية المساعدة التي تستخدمها عادةً (يمكنك اختيار أكثر من واحدة)؟

- تقنيات بريل
- القواميس إلكترونية
- تطبيقات الهواتف الذكية

- قارئات الشاشة
- تقنيات التعرف الضوئي على الحروف
- تقنيات تحويل النص إلى صوت
- أخرى.....

---

## الجزء الثاني : الأداء المتوقع

الرجاء اختيار ما يعبر عن مدى موافقتك على كل عبارة من العبارات التالية :

| العنصر                                                                              | لا أوافق بشدة | لا أوافق | محايد | أوافق | أوافق بشدة |
|-------------------------------------------------------------------------------------|---------------|----------|-------|-------|------------|
| استخدام التقنيات المساعدة مفيد لي في دراستي                                         |               |          |       |       |            |
| استخدام التقنيات المساعدة يسمح لي أن أنجز مهامي الدراسية بشكل أسرع                  |               |          |       |       |            |
| استخدام التقنيات المساعدة يزيد من إنتاجي                                            |               |          |       |       |            |
| إذا استخدمت التقنيات المساعدة سوف أزيد من فرصتي في الحصول على معدل دراسي أعلى       |               |          |       |       |            |
| استخدام التقنيات المساعدة يضيع وقتي                                                 |               |          |       |       |            |
| استخدام التقنيات المساعدة يساعد في تقليص الوقت المستهلك في الواجبات الدراسية الهامة |               |          |       |       |            |

## الجزء الثالث : الجهد المتوقع

الرجاء اختيار ما يعبر عن مدى موافقتك على كل عبارة من العبارات التالية :

| العنصر                                                              | لا أوافق بشدة | لا أوافق | محايد | أوافق | أوافق بشدة |
|---------------------------------------------------------------------|---------------|----------|-------|-------|------------|
| تفاعلي مع التقنيات المساعدة واضح ومفهوم                             |               |          |       |       |            |
| أجد من السهل بالنسبة لي أن أصبح متقن لاستخدام التقنيات المساعدة     |               |          |       |       |            |
| أجد أن التقنيات المساعدة سهلة الاستخدام                             |               |          |       |       |            |
| تعلم كيفية استخدام التقنيات المساعدة سهل بالنسبة لي                 |               |          |       |       |            |
| أجد من السهل استخدام التقنيات المساعدة للحصول على المعرفة التي أريد |               |          |       |       |            |
| أجد مرونة عند تعاملي مع التقنيات المساعدة                           |               |          |       |       |            |

## الجزء الرابع : التأثير الاجتماعي.

الرجاء اختيار ما يعبر عن مدى موافقتك على كل عبارة من العبارات التالية :

| العنصر                                                                       | لا أوافق بشدة | لا أوافق | محايد | أوافق | أوافق بشدة |
|------------------------------------------------------------------------------|---------------|----------|-------|-------|------------|
| يعتقد الناس الذين لهم تأثير على سلوكي بأنه يجب علي استخدام التقنيات المساعدة |               |          |       |       |            |
| يعتقد الناس المهمين بالنسبة لي أنه يجب علي استخدام التقنيات المساعدة         |               |          |       |       |            |
| يساعدني موظفي الجامعة في استخدام التقنيات المساعدة                           |               |          |       |       |            |
| بشكل عام تدعم الجامعة استخدام التقنيات المساعدة                              |               |          |       |       |            |
| سوف استخدم التقنيات المساعدة إذا استخدمها أصدقائي                            |               |          |       |       |            |
| يؤيد أعضاء هيئة التدريس بالجامعة استخدام التقنيات المساعدة في الدراسة        |               |          |       |       |            |

## الجزء الخامس : الحالات الميسرة.

الرجاء اختيار ما يعبر عن مدى موافقتك على كل عبارة من العبارات التالية :

| العنصر                                                                             | لا أوافق بشدة | لا أوافق | محايد | أوافق | أوافق بشدة |
|------------------------------------------------------------------------------------|---------------|----------|-------|-------|------------|
| لدي الموارد اللازمة لاستخدام التقنيات المساعدة                                     |               |          |       |       |            |
| لدي المعلومات والمعرفة اللازمة التي تجعلني استخدم التقنيات المساعدة                |               |          |       |       |            |
| التقنيات المساعدة متوافقة مع الأنظمة الأخرى التي استخدمها.                         |               |          |       |       |            |
| يوجد شخص ( أو مجموعة أشخاص ) بالجامعة للمساعدة في صعوبات استخدام التقنيات المساعدة |               |          |       |       |            |
| لدي الخبرة الكافية لاستخدام التقنيات المساعدة                                      |               |          |       |       |            |

|  |  |  |  |  |                                                                            |
|--|--|--|--|--|----------------------------------------------------------------------------|
|  |  |  |  |  | اعتقد بان استخدام التقنيات المساعدة يتناسب تماما مع طريقة التعلم الخاصة بي |
|--|--|--|--|--|----------------------------------------------------------------------------|

### الجزء السادس : المواقف تجاه استخدام التكنولوجيا.

الرجاء اختيار ما يعبر عن مدى موافقتك على كل عبارة من العبارات التالية :

| <u>العنصر</u>                                   | لا أوافق بشدة | لا أوافق | محايد | أوافق | أوافق بشدة |
|-------------------------------------------------|---------------|----------|-------|-------|------------|
| استخدام التقنيات المساعدة فكرة جيدة             |               |          |       |       |            |
| استخدم التقنيات المساعدة يجعل التعلم أكثر إثارة |               |          |       |       |            |
| التعليم باستخدام التقنيات المساعدة ممتع         |               |          |       |       |            |
| يعجبني التعليم باستخدام التقنيات المساعدة       |               |          |       |       |            |
| استخدام التقنيات المساعدة ممل                   |               |          |       |       |            |
| استخدام التقنيات المساعدة مسلي                  |               |          |       |       |            |

### الجزء السابع : النية السلوكية.

الرجاء اختيار ما يعبر عن مدى موافقتك على كل عبارة من العبارات التالية :

| <u>العنصر</u>                                                | لا أوافق بشدة | لا أوافق | محايد | أوافق | أوافق بشدة |
|--------------------------------------------------------------|---------------|----------|-------|-------|------------|
| إنني انوي استخدام التقنيات المساعدة في كثير من الاحيان       |               |          |       |       |            |
| أتوقع أنني يجب أن استخدم التقنيات المساعدة في المستقبل       |               |          |       |       |            |
| أتوقع أنني سوف أستمر في استخدام التقنيات المساعدة بشكل منتظم |               |          |       |       |            |
| أنا أخطط لاستخدام التقنيات المساعدة في دراستي                |               |          |       |       |            |
| أود ان أودي أنشطتي الدراسية باستخدام التقنيات المساعدة       |               |          |       |       |            |

## الجزء الثامن : الكفاءة الذاتية.

الرجاء اختيار ما يعبر عن مدى موافقتك على كل عبارة من العبارات التالية :

| العنصر                                                                                                        | لا أوافق بشدة | لا أوافق | محايد | أوافق | أوافق بشدة |
|---------------------------------------------------------------------------------------------------------------|---------------|----------|-------|-------|------------|
| يمكنني اكمال مهمة ما مستخدما التقنيات المساعدة اذا لم يكن بالجوار أي شخص يخبرني بماعلي فعله                   |               |          |       |       |            |
| يمكنني اكمال مهمة ما مستخدما التقنيات المساعدة اذا كان بإمكانني الاتصال بشخص للمساعدة إذا واجهت مصاعب         |               |          |       |       |            |
| يمكنني اكمال مهمة ما مستخدما التقنيات المساعدة اذا كان لدي الكثير من الوقت لاكمالها                           |               |          |       |       |            |
| يمكنني اكمال مهمة ما مستخدما التقنيات المساعدة اذا كان لدي فقط وسائل مدمجة للمساعدة                           |               |          |       |       |            |
| سوف أكون قادر على النجاح في التغلب على الكثير من التحديات الدراسية باستخدام التقنيات المساعدة                 |               |          |       |       |            |
| انا واثق من أنني قادر على اؤدي بشكل فعال في العديد من المهام المختلفة باستخدام التقنيات المساعدة              |               |          |       |       |            |
| مقارنه مع الطلاب ضعاف البصر الاخرين الذين لا يستخدموا التقنيات المساعدة، يمكنني أن أفعل معظم المهام بشكل جيد. |               |          |       |       |            |

## الجزء التاسع : القلق .

الرجاء اختيار ما يعبر عن مدى موافقتك على كل عبارة من العبارات التالية :

| العنصر                                                                                                             | لا أوافق بشدة | لا أوافق | محايد | أوافق | أوافق بشدة |
|--------------------------------------------------------------------------------------------------------------------|---------------|----------|-------|-------|------------|
| أشعر بتخوف حول استخدام التقنيات المساعدة.                                                                          |               |          |       |       |            |
| إنه يخيفني التفكير في أنني يمكن أن أفقد الكثير من المعلومات أثناء استخدام التقنيات المساعدة بالضغط على الزر الخاطئ |               |          |       |       |            |
| أتردد في استخدام التقنيات المساعدة خوفا من الوقوع في خطأ لا يمكن تصحيحه.                                           |               |          |       |       |            |

|  |  |  |  |  |                                                                        |
|--|--|--|--|--|------------------------------------------------------------------------|
|  |  |  |  |  | التقنيات المساعدة تكون مخيفة بعض الشيء بالنسبة لي.                     |
|  |  |  |  |  | سوف اكون ممانع لاستخدام التقنيات المساعدة لانني لست على دراية جيدة بها |

### الجزء العاشر : إمكانية الوصول .

الرجاء اختيار ما يعبر عن مدى موافقتك على كل عبارة من العبارات التالية :

| أوافق بشدة | أوافق | محايد | لا أوافق بشدة | لا أوافق بشدة | <u>العنصر</u>                                                                                    |
|------------|-------|-------|---------------|---------------|--------------------------------------------------------------------------------------------------|
|            |       |       |               |               | لدي سهولة في الوصول إلى أجهزة التقنيات المساعدة في الجامعة.                                      |
|            |       |       |               |               | سهولة الوصول إلى أجهزة التقنيات المساعدة في العديد من المواقع في الجامعة ستكون مفيدة بالنسبة لي. |
|            |       |       |               |               | توفير أجهزة التقنيات المساعدة في غرفة الصف مهم لنجاحي                                            |
|            |       |       |               |               | سهولة الوصول إلى أجهزة التقنيات المساعدة في المنزل والجامعة مفيد.                                |
|            |       |       |               |               | أجهزة التقنيات المساعدة المحمولة والمتنقلة التي تحمل في كل مكان ستكون مفيدة                      |

### الجزء العاشر : سلوك الاستخدام .

الرجاء اختيار ما يعبر عن مدى موافقتك على كل عبارة من العبارات التالية :

| أوافق بشدة | أوافق | محايد | لا أوافق بشدة | لا أوافق بشدة | <u>العنصر</u>                                          |
|------------|-------|-------|---------------|---------------|--------------------------------------------------------|
|            |       |       |               |               | اريد ان استخدم التقنيات المساعدة لاداء انشطتي الدراسية |
|            |       |       |               |               | انا استخدم التقنيات المساعدة بشكل متكرر                |
|            |       |       |               |               | انا استخدم التقنيات المساعدة على نحو منتظم             |
|            |       |       |               |               | معظم مهامى الدراسية انجزت باستخدام التقنيات المساعدة   |

شكرا جزيلا على إعطاءنا من وقتك الثمين ومشاركتك في هذه الدراسة

➤ اذا كان لديك أية تعليق أو اقتراح الرجاء إضافته و كتابته في الأسطر التالية :

.....

.....

.....

.....

.....

.....

.....

➤ إذا كنت مهتماً بنتائج البحث أو بالمشاركة مستقبلا في هذا الرجاء إضافة إيميلك

.....

.....
