# Supplementary material for: Assistive technology acceptance for visually impaired individuals: a case study of students in Saudi Arabia
Source: PeerJ journal article supplement (doi:10.7717/peerj-cs.886), 2022-03-11
Supplement: Interview_Questions2.pdf [file Interview_Questions2.pdf]

# Interview Questions

This interview seeks your views of the results of a survey about attitudes of visually impaired students towards acceptance and use of assistive technology (AT). Before participating in the interview, please carefully read the document entitled Quantitative Report, which provides a background to the project, the research methodology, and the results of the survey.

## Your details

- What university do you study in / work to?
- What is your position?
- How would you likely describe your experience with AT?
- What types of AT you use / deal with?

## Your views

### **Category 1: Performance expectancy**

- How does 'expecting good performance' affect the 'intention to use AT? Why?
- How do you think that age will affect this relationship? Please elaborate?
- How do you think that gender will affect this relationship? Why?
- How do you think that experience with computers will affect this relationship? Why?
- How do you consider that level of education will affect this relationship? Please elaborate?
- How do you think the duration that an individual has had a visual impairment will affect this relationship? Please elaborate?
- How do you think the severity of visual impairment will affect this relationship? Please elaborate?

### **Category 2: Effort expectancy**

- How does 'expecting less effort when using AT' affect the 'intention to use it? Please elaborate?
- How do you think that age will affect this relationship? Please elaborate?
- How do you think that gender will affect this relationship? Why?
- How do you think that experience with computers will affect this relationship? Why?
- How do you consider that level of education will affect this relationship? Please elaborate?
- How do you think the duration that an individual has had a visual impairment will affect this relationship? Please elaborate?

- How do you think the severity of visual impairment will affect this relationship? Please elaborate?

### **Category 3: Social influence**

- How does social influence affect the 'intention to use AT? Why?
- How do you think that age will affect this relationship? Please elaborate?
- How do you think that gender will affect this relationship? Why?
- How do you think that experience with computers will affect this relationship? Why?
- How do you consider that level of education will affect this relationship? Please elaborate?
- How do you think the duration that an individual has had a visual impairment will affect this relationship? Please elaborate?
- How do you think the severity of visual impairment will affect this relationship? Please elaborate?

### **Category 4: Accessibility**

- How does the degree to which a person has the ability to access and use AT can affect the 'intention to use AT? Please elaborate?
- How do you think that age will affect this relationship? Please elaborate?
- How do you think that gender will affect this relationship? Why?
- How do you think that experience with computers will affect this relationship? Why?
- How do you consider that level of education will affect this relationship? Please elaborate?
- How do you think the duration that an individual has had a visual impairment will affect this relationship? Please elaborate?
- How do you think the severity of visual impairment will affect this relationship? Please elaborate?

### **Category 5: Self-efficacy**

- How does increasing a user's ability to perform a specific task by using AT can affect the 'intention to use it? Please elaborate?
- How do you think that age will affect this relationship? Please elaborate?
- How do you think that gender will affect this relationship? Why?
- How do you think that experience with computers will affect this relationship? Why?
- How do you consider that level of education will affect this relationship? Please elaborate?
- How do you think the duration that an individual has had a visual impairment will affect this relationship? Please elaborate?

- How do you think the severity of visual impairment will affect this relationship? Please elaborate?

### **Category 6: Anxiety**

- How does anxiety about using AT can affect a user's intention to use it? Why?
- How do you think that age will affect this relationship? Please elaborate?
- How do you think that gender will affect this relationship? Why?
- How do you think that experience with computers will affect this relationship? Why?
- How do you consider that level of education will affect this relationship? Please elaborate?
- How do you think the duration that an individual has had a visual impairment will affect this relationship? Please elaborate?
- How do you think the severity of visual impairment will affect this relationship? Please elaborate?

### **Category 7: Attitude toward using technology**

- How does the user's attitude towards technology can affect the behavioural intention to use AT? Please elaborate?
- How do you think that age will affect this relationship? Please elaborate?
- How do you think that gender will affect this relationship? Why?
- How do you think that experience with computers will affect this relationship? Why?
- How do you consider that level of education will affect this relationship? Please elaborate?
- How do you think the duration that an individual has had a visual impairment will affect this relationship? Please elaborate?
- How do you think the severity of visual impairment will affect this relationship? Please elaborate?

### **Category 8: Behavioural intention to use AT**

- How does the intention to use AT can affect actual user behaviour? Why?
- How do you think that age will affect this relationship? Please elaborate?
- How do you think that gender will affect this relationship? Why?
- How do you think that experience with computers will affect this relationship? Why?
- How do you consider that level of education will affect this relationship? Please elaborate?
- How do you think the duration that an individual has had a visual impairment will affect this relationship? Please elaborate?

- How do you think the severity of visual impairment will affect this relationship? Please elaborate?

### **Category 9: Facilitating conditions**

- How does facilitating conditions such as obtaining resources and knowledge necessary to use AT can affect actual user behaviour? Please elaborate?
- How do you think that age will affect this relationship? Please elaborate?
- How do you think that gender will affect this relationship? Why?
- How do you think that experience with computers will affect this relationship? Why?
- How do you consider that level of education will affect this relationship? Please elaborate?
- How do you think the duration that an individual has had a visual impairment will affect this relationship? Please elaborate?
- How do you think the severity of visual impairment will affect this relationship? Please elaborate?

### **Category 10: additional information**

- Please choose the most important factors of the following factors to indicate your view of its effect on the user's acceptance of AT.
  - ..... Performance expectancy
  - ..... Effort expectancy
  - ..... Attitude toward using technology
  - ..... Social influence
  - ..... Facilitating conditions
  - ..... Self-efficacy
  - ..... Anxiety
  - ..... Accessibility
- Why do think these factors are very important?
- What other factors do you believe can affect a user's acceptance of assistive technology?
- Do you have any further comment or suggestion?

Thank you very much for your time and valuable contribution to this research.
