# Supplementary material for: Assistive technology acceptance for visually impaired individuals: a case study of students in Saudi Arabia
Source: PeerJ Comput Sci. 2022 Mar 11;8:e886. doi: 10.7717/peerj-cs.886 (PMC9044340; doi:10.7717/peerj-cs.886)
Supplement: Supplemental Information 1 [file peerj-cs-08-886-s001.xlsx]

## Sheet: Final1
ID	Q1	Q2	Q3	Q4	Q5_1	Q5_2	Q5_3	Q5_4	Q5_5	Q5_6	Q5_7	Q5_8	Q6	Q7_1	Q7_2	Q7_3	Q7_4	Q7_5	Q7_6	Q7_7	Q8	Q9	Q10	Q11	PE1	PE2	PE3	PE4	PE5	PE6	EE1	EE2	EE3	EE4	EE5	EE6	SI1	SI2	SI3	SI4	SI5	SI6	FC1	FC2	FC3	FC4	FC5	FC6	ATUT1
1	1	2	1	3	1				1	1			5	1	1						3	2	4	3	5	5	5	5	1	5	5	5	4	5	5	4	3	3	2	2	3	4	2	4	3	2	3	4	5
2	1	3	3	3	1					1			5	1	1	1					5	2	1	3	5	5	5	5	1	5	5	5	5	5	5	5	5	5	4	5	1	5	5	5	5	3	5	5	5
3	1	1	1	2	1				1	1			5	1	1						4	2	1	2	5	5	3	4	1	4	4	4	4	4	3	4	3	3	2	3	4	4	2	3	2	3	3	4	5
4	1	2	1	2	1			1	1	1			5					1			2	2	1	2	5	5	5	4	1	5	1	3	3	4	4	4	3	4	1	1	1	2	2	4	2	1	4	5	5
5	1	2	1	2	1				1	1			5			1					5	3	1	2	5	5	5	5	1	5	4	4	5	4	5	4	5	5	2	2	1	2	3	5	4	1	4	5	5
6	2	2	1	3	1	1				1			2			1					4	2	1	3	4	5	4	4	1	4	4	5	5	4	4	4	2	4	4	5	4	4	4	4	4	4	4	4	5
7	2	4	1	2		1				1			5					1			3	3	1	2	5	5	5	5	2	5	5	5	5	5	4	4	1	1	4	4	1	3	4	4	4	4	4	5	5
8	2	2	1	2	1	1				1			5	1	1	1	1				3	3	1	2	5	5	5	4	1	5	5	4	4	4	4	4	5	5	5	4	3	4	4	4	4	5	4	5	5
9	2	3	1	2	1	1				1			5		1				1	Circumstances are the biggest supportive proof of existence	5	3	1	2	5	5	5	5	3	3	5	5	3	5	2	3	1	1	4	5	3	3	3	5	3	2	5	4	5
10	2	1	1	3	1					1			5		1				1	Support from a coach outside the university, Rania Sharif	5	2	2	2	5	5	5	5	1	5	5	5	5	5	5	5	2	4	3	4	1	1	5	4	4	3	4	5	5
11	1	5	2	2	1					1			5	1		1					5	4	2	3	5	5	5	5	1	5	5	5	5	5	5	5	5	5	1	1	1	3	2	5	2	1	5	5	5
12	2	4	1	3	1					1			5	1					1	Educational centers, Absar Center, Al-Maram Center, Chamber of Commerce	5	2	2	2	5	5	5	5	1	5	5	4	5	4	4	5	4	5	5	5	1	5	4	4	4	5	4	5	5
13	2	2	1	2	1	1				1			5			1	1		1		5	2	1	3	5	5	5	5	1	5	5	5	5	5	5	5	5	5	5	5	4	5	1	4	1	5	4	5	5
14	2	4	1	3	1	1	1	1	1	1			5	1	1	1	1				5	3	2	3	5	5	5	4	1	3	5	5	5	5	5	5	5	5	4	4	1	3	4	5	4	4	5	5	5
15	1	4	1	3	1	1	1		1	1			5					1			1	1	2	3	5	5	5	5	1	4	5	4	4	4	4	4	3	3	1	1	1	1	3	5	4	1	4	5	5
16	2	2	1	3	1	1							5		1	1					5	2	1	1	5	5	4	3	2	4	4	4	5	4	4	4	4	4	4	4	1	3	2	4	2	5	4	5	5
17	2	1	2	3	1	1				1			2			1					5	2	1	1	5	5	4	5	1	5	4	4	3	4	3	4	3	4	3	2	3	2	4	4	3	3	3	4	5
18	1	4	1	3	1	1		1	1	1			5		1	1					5	3	1	2	5	4	5	3	1	5	3	4	3	4	4	3	3	4	2	3	5	3	3	3	2	3	4	4	5
19	1	4	1	2	1	1	1		1	1			5	1	1	1					5	2	1	2	5	4	5	5	1	5	4	4	4	5	4	4	2	4	1	3	1	1	1	4	1	1	5	5	5
20	2	2	1	3	1	1				1			2	1	1	1	1				4	2	1	2	5	5	4	4	1	4	5	4	4	5	4	5	3	4	5	5	4	4	3	4	4	4	2	4	5
21	2	3	1	2	1	1				1			5						1	self-supporting	3	3	1	2	5	4	5	5	1	3	5	5	4	5	3	5	3	4	3	5	3	3	3	4	4	5	4	5	5
22	1	3	1	3	1	1				1			5	1	1						5	3	1	2	4	5	5	4	1	5	5	5	4	4	4	4	3	4	2	4	5	3	4	4	4	2	5	5	5
23	1	3	1	1	1	1				1			5		1						4	1	2	3	5	4	4	4	1	4	4	5	5	5	4	4	3	4	3	2	4	2	2	4	3	3	4	4	4
24	1	2	1	3	1			1	1	1			5	1	1						4	2	4	3	5	5	5	5	1	5	5	5	4	5	5	5	3	3	3	3	1	3	3	4	4	3	4	5	5
25	1	5	2	2	1	1			1	1			5		1	1					2	1	1	2	3	3	4	3	2	3	4	4	4	4	4	4	2	2	3	3	3	4	4	3	3	3	4	4	4
26	2	4	3	3	1				1	1			5					1			1	3	5	2	4	4	4	1	5	4	4	4	4	4	5	4	1	1	1	1	1	4	3	4	4	1	4	4	5
27	1	1	1	2	1				1	1			5	1	1						4	2	1	2	5	5	4	5	1	4	4	5	4	4	4	4	3	3	3	4	3	5	3	4	3	3	3	4	5
28	2	2	1	3	1	1				1			5		1	1	1				5	2	5	1	5	5	4	4	1	4	4	4	4	4	4	4	4	3	3	3	2	4	2	4	3	2	4	4	5
29	1	2	1	3	1	1		1	1	1			5	1	1	1	1				5	2	1	2	5	5	5	4	2	5	5	4	4	4	5	5	5	5	3	2	1	3	5	4	4	3	4	4	5
30	2	2	1	2	1	1				1			5					1			5	2	6	3	5	5	5	5	1	5	5	5	5	5	4	4	4	5	1	2	2	4	4	4	2	1	4	4	4
31	2	2	4	2	1					1			5		1						4	2	2	2	5	5	5	5	1	5	4	3	5	5	5	4	5	5	3	3	1	4	2	3	5	3	5	5	5
32	2	5	2	3	1					1			5	1		1					4	2	2	1	5	5	5	4	1	4	5	3	3	3	3	3	4	4	4	4	2	3	2	3	3	4	3	4	5
33	1	3	1	2	1	1			1	1			5					1			5	1	6	2	5	5	5	5	1	5	4	5	5	4	4	4	1	1	1	1	4	1	1	4	3	1	4	4	5
34	1	2	1	1	1								5		1						5	2	1	1	5	5	5	4	1	4	5	5	5	4	5	4	3	3	3	2	5	3	3	4	4	3	4	4	5
35	2	1	1	2		1			1	1			3			1					3	2	1	1	5	5	5	5	2	5	4	4	3	4	4	4	1	3	4	4	1	3	2	3	2	4	3	5	5
36	2	4	2	1					1				3					1			5	2	3	2	4	4	4	4	2	4	4	4	4	4	4	4	4	5	1	3	3	4	4	4	3	4	4	4	4
37	2	2	2	3	1	1				1			5	1	1				1	The center for people with special needs at the two universities of King Saud University, and before that, the support was from the computer teacher during my studies at the institute	5	2	1	2	5	4	5	4	2	4	4	4	4	5	4	4	4	4	4	4	2	4	4	4	4	5	4	4	5
38	2	4	1	3	1	1			1	1			5	1		1					5	2	1	2	5	5	5	5	1	5	5	2	4	4	5	5	4	4	4	4	5	5	1	4	5	5	4	5	5
39	2	2	1	2						1			5		1						4	2	3	1	4	5	5	4	2	4	5	5	4	4	5	4	4	5	2	2	4	4	4	4	3	1	4	4	5
40	2	1	1	2	1	1				1			5		1						4	2	3	2	5	5	5	5	2	3	3	4	4	5	5	4	5	5	2	2	5	3	2	4	3	1	2	4	5
41	2	2	1	2	1	1			1	1			5	1	1	1					5	2	5	1	5	5	5	5	1	5	4	4	5	3	5	3	2	4	2	4	1	3	2	4	4	2	3	4	5
42	2	3	1	2	1	1				1			5			1	1				4	3	1	3	5	5	5	5	2	5	5	5	5	5	4	4	2	2	4	4	3	4	4	4	2	4	4	4	5
43	2	1	1	3	1				1				5			1					5	2	5	2	5	5	5	5	1	5	5	4	5	5	5	5	5	5	5	5	3	5	5	5	5	5	4	5	5
44	2	1	1	1	1			1		1			5		1						3	2	2	1	5	4	4	4	2	3	4	4	4	4	4	4	3	3	3	3	3	3	4	4	4	3	4	4	4
45	2	3	4	2	1	1			1	1			5	1	1						5	3	1	1	5	5	5	5	2	5	5	5	4	4	4	4	3	3	3	4	3	3	3	4	3	4	4	3	5
46	2	1	1	3	1	1			1	1			5		1		1				5	2	1	3	5	5	5	5	1	5	4	4	5	5	5	5	4	4	4	4	1	5	4	4	3	5	5	5	5
47	2	5	2	2	1	1			1	1	1	electronic speaker	5	1	1	1	1				5	2	2	3	5	5	5	5	3	4	5	5	4	5	5	5	2	2	5	5	2	3	2	5	4	3	5	5	5
48	1	3	1	2	1	1			1	1			5					1			3	2	1	2	4	4	5	3	2	3	5	4	3	3	3	3	3	3	2	3	1	2	4	3	3	1	3	3	4
49	1	2	2	3	1				1	1			5		1	1					4	2	4	3	5	5	5	5	2	5	5	5	5	5	5	5	5	5	3	2	1	3	3	5	3	1	5	5	5
50	1	1	2	2	1					1	1	Magnifying electronic devices	2	1	1	1	1				5	2	4	1	5	5	5	5	4	5	1	4	4	4	3	4	3	4	4	1	5	3	1	4	4	1	3	4	5
51	1	2	1	2						1			5					1	1		3	2	7	2	5	5	5	5	1	5	5	4	4	4	5	5	1	1	1	1	1	1	1	4	3	5	4	5	5
52	1	2	1	2						1			3					1			3	2	8	3	4	5	4	4	2	4	4	5	2	5	3	3	2	3	1	2	3	1	4	5	3	1	5	3	5
53	1	2	1	3	1	1			1	1			5	1	1						5	2	1	2	5	4	5	4	1	5	4	5	5	4	5	4	4	5	1	1	5	3	3	5	3	1	4	5	5
54	1	2	1	1	1	1			1	1			5	1	1						4	2	3	1	5	4	4	2	2	4	4	3	4	3	3	4	3	4	4	4	3	4	4	4	4	2	4	3	4
55	1	1	1	1	1	1	1	1	1	1			5		1	1					5	2	4	1	5	4	4	4	3	4	4	4	4	4	4	4	3	3	2	2	1	2	3	3	2	1	3	4	5
56	1	3	1	1						1			5	1	1	1					5	2	4	2	5	4	5	3	3	4	3	4	4	4	5	5	3	4	2	2	4	4	2	4	4	2	3	3	5
57	1	4	1	3					1	1			5					1			5	2	3	1	4	5	5	5	2	4	4	4	5	4	4	5	3	4	4	4	5	5	4	4	4	4	4	5	5
58	1	2	2	2	1	1			1	1			4	1		1					4	2	3	1	5	5	5	4	3	4	2	5	4	5	5	4	4	2	1	1	3	1	2	5	5	1	5	5	5
59	2	2	1	2	1	1			1	1			3	1	1	1					4	2	1	2	4	4	4	4	2	4	4	4	4	4	4	4	4	4	3	3	3	3	3	4	4	4	3	4	4
60	1	3	1	2	1	1			1	1			5		1						3	2	7	2	5	5	5	5	1	5	5	5	5	5	5	5	3	5	1	1	5	1	3	5	3	3	5	5	5
61	1	4	1	3	1	1				1			5	1	1	1					5	3	7	2	5	5	4	5	2	4	4	4	4	4	4	4	4	4	3	4	2	4	4	4	4	3	4	4	5
62	1	2	1	2						1	1	A3 Paper	5						1	Compulsory support for them	5	2	7	2	5	5	5	5	1	5	5	3	5	3	5	5	2	2	1	1	1	1	5	3	5	1	3	5	5
63	1	2	1	1		1							5	1		1					5	2	8	1	5	4	4	5	2	4	4	3	3	2	2	2	5	5	5	4	4	4	2	3	3	2	2	4	4
64	1	2	1	2	1	1				1			3	1	1	1					5	3	4	3	5	5	4	5	1	4	4	4	4	4	4	4	4	4	3	2	4	3	3	4	3	2	4	5	5
65	1	3	3	2	1	1				1			5	1	1	1	1				3	2	4	1	4	4	4	4	1	4	4	4	4	4	4	4	4	4	3	4	3	3	3	4	2	4	4	3	5
66	2	2	2	2						1			2			1					5	2	9	1	5	5	5	5	1	2	5	5	5	5	5	5	4	5	4	4	5	5	4	4	4	5	5	5	4
67	1	1	1	3	1	1				1			5	1	1	1	1				5	2	2	2	5	5	5	5	2	4	5	5	5	5	5	5	3	3	4	4	3	4	5	4	5	3	4	5	5
68	1	4	2	3	1	1				1			5					1			5	4	4	2	5	5	5	5	1	5	5	5	5	5	4	5	3	3	2	2	3	3	2	5	5	2	5	5	5
69	1	4	1	2	1	1					1	Screen readers	5					1	1	I can't find support from anyone	5	2	9	2	3	2	4	4	4	4	4	4	4	3	2	2	3	2	2	2	2	1	2	2	3	1	2	3	4
70	2	1	1	2		1							3			1					4	1	1	1	4	4	5	4	4	4	4	4	4	4	4	4	4	4	4	4	4	4	4	4	4	4	4	4	4
71	1	4	1	3	1	1			1	1			5	1	1						5	1	2	3	5	5	5	5	2	4	5	5	3	5	5	5	5	5	3	4	3	3	3	5	3	5	5	5	5
72	1	2	4	1		1				1			3					1			5	2	1	1	5	5	5	4	5	1	1	2	3	1	3	2	5	5	1	1	1	3	2	1	1	1	1	1	4
73	2	3	2	3		1			1	1			4		1	1	1				3	2	9	2	4	4	3	4	1	4	4	4	4	3	3	4	3	4	3	3	4	4	4	4	4	3	3	4	4
74	2	3	1	3	1	1			1	1			5	1		1	1				5	3	1	2	4	5	4	4	1	4	5	5	4	5	4	4	3	4	4	5	1	4	2	4	3	5	4	4	5
75	2	2	1	2	1					1	1	Screen readers are largely unhelpful. There is no useful information in the backbone of a device	5	1	1	1			1	The most support comes from a person after trying to use a device	3	2	1	2	5	4	4	4	2	2	5	4	4	5	4	5	3	3	1	5	4	4	3	4	4	5	2	3	5
76	2	2	1	1		1	1		1	1			5	1							1	3	1	3	5	4	3	3	1	4	5	3	4	4	5	5	5	5	3	5	1	5	4	5	3	5	4	3	5
77	2	1	1	3	1	1				1			5			1	1				3	2	1	3	5	5	5	5	1	5	5	5	5	5	4	4	5	5	4	4	3	4	4	4	4	4	4	4	4
78	1	3	1	2	1								5	1							4	2	2	2	4	4	4	4	1	4	4	4	4	4	4	4	4	4	4	4	4	4	4	4	4	4	4	4	4
79	2	2	2	3	1	1				1			5	1	1	1	1				5	2	1	2	5	4	4	4	1	4	4	4	4	4	4	4	5	5	4	5	2	5	4	4	4	5	4	4	5
80	1	1	1	1	1								5	1	1		1	1			5	2	1	3	5	5	5	4	1	4	4	4	5	5	5	5	2	4	3	3	1	4	5	5	5	4	5	5	5
81	1	2	2	1	1					1			5					1			3	2	1	1	5	5	5	5	3	3	3	4	4	4	4	4	3	3	3	4	2	4	3	4	4	3	3	4	4
82	1	2	1	1						1	1	Increase font	5	1		1	1				4	2	1	1	5	5	5	4	1	5	4	4	4	4	4	4	5	5	5	4	1	4	5	4	4	2	4	4	4
83	1	1	1	1						1			3					1			4	2	1	3	5	5	5	5	2	3	4	5	5	5	5	5	5	5	1	1	3	3	1	5	4	2	5	5	5
84	1	1	3	3	1								5			1					5	1	10	1	5	5	5	5	1	5	4	1	5	1	5	5	5	5	1	1	1	5	5	5	5	5	5	5	5
[truncated: 31 more columns]
